# Supplementary material for: Creating an atlas of the bone microenvironment during oral inflammatory-related bone disease using single-cell profiling
Source: eLife journal article supplement (doi:10.7554/elife.82537), 2023-02-01
Supplement: supp [file elife-82537-supp-v1.zip]

## Sheet: Sheet1
Figure 3I Heatmap of genes associated with osteoclastogenesis in bulk RNA-seq analysis.
gene_id	gene_name	EntrezID	transcript_id	GO	KEGG	KO_ENTRY	EC	Description	trans_type	Reactome	FPKM.AP_1	FPKM.AP_2	FPKM.Ctrl_1	FPKM.Ctrl_2	fc	log2(fc)	pval	qval	regulation
ENSMUSG00000028111	Ctsk	87759	ENSMUST00000015664	GO:0001957(intramembranous ossification);GO:0001968(fibronectin binding);GO:0004197(cysteine-type endopeptidase activity);GO:0005518(collagen binding);GO:0005576(extracellular region);GO:0005615(extracellular space);GO:0005654(nucleoplasm);GO:0005737(cytoplasm);GO:0005764(lysosome);GO:0005886(plasma membrane);GO:0006508(proteolysis);GO:0006590(thyroid hormone generation);GO:0006955(immune respons…	04142(Lysosome);04210(Apoptosis);04380(Osteoclast differentiation);04620(Toll-like receptor signaling pathway);05323(Rheumatoid arthritis)	K01371	EC:3.4.22.38	cathepsin K [Source:MGI Symbol;Acc:MGI:107823]	protein_coding	R_MMU_1442490(Collagen_degradation);R_MMU_73857(RNA_Polymerase_II_Transcription);R_MMU_168898(Toll_like_Receptor_Cascades);R_MMU_212436(Generic_Transcription_Pathway);R_MMU_8939242(RUNX1_regulates_transcription_of_genes_involved_in_differentiation_of_keratinocytes);R_MMU_1474244(Extracellular_matrix_organization);R_MMU_1474228(Degradation_of_the_extracellular_matrix);R_MMU_168256(Immune_System);R…	1552.34	1364.85	293.551	288.103	5.01535	2.32635	5.66663e-49	5.47472e-45	up
ENSMUSG00000017737	Mmp9	82767;82768;82769;82766	ENSMUST00000017881;ENSMUST00000134382;ENSMUST00000144917;ENSMUST00000137626	GO:0001501(skeletal system development);GO:0001934(positive regulation of protein phosphorylation);GO:0001968(fibronectin binding);GO:0002687(positive regulation of leukocyte migration);GO:0004175(endopeptidase activity);GO:0004222(metalloendopeptidase activity);GO:0004252(serine-type endopeptidase activity);GO:0005576(extracellular region);GO:0005615(extracellular space);GO:0006508(proteolysis);…	01522(Endocrine resistance);04657(IL-17 signaling pathway);04668(TNF signaling pathway);04670(Leukocyte transendothelial migration);04915(Estrogen signaling pathway);04926(Relaxin signaling pathway);05161(Hepatitis B);05200(Pathways in cancer);05202(Transcriptional misregulation in cancer);05205(Proteoglycans in cancer);05206(MicroRNAs in cancer);05215(Prostate cancer);05219(Bladder cancer);05418…	K01403	EC:3.4.24.35	matrix metallopeptidase 9 [Source:MGI Symbol;Acc:MGI:97011]	protein_coding;retained_intron;processed_transcript	R_MMU_1442490(Collagen_degradation);R_MMU_2022090(Assembly_of_collagen_fibrils_and_other_multimeric_structures);R_MMU_9009391(Extra_nuclear_estrogen_signaling);R_MMU_9006931(Signaling_by_Nuclear_Receptors);R_MMU_1474244(Extracellular_matrix_organization);R_MMU_1474228(Degradation_of_the_extracellular_matrix);R_MMU_168256(Immune_System);R_MMU_422475(Axon_guidance);R_MMU_8939211(ESR_mediated_signal…	394.541	457.959	318.399	308.573	1.35971	0.443298	0.000233486	0.00305111	up
ENSMUSG00000001348	Acp5	135457;135456;135458;135459;135455;135460	ENSMUST00000115315;ENSMUST00000165735;ENSMUST00000213815;ENSMUST00000217643;ENSMUST00000069330;ENSMUST00000216684	GO:0001503(ossification);GO:0003993(acid phosphatase activity);GO:0005764(lysosome);GO:0008198(ferrous iron binding);GO:0008199(ferric iron binding);GO:0016311(dephosphorylation);GO:0016787(hydrolase activity);GO:0032496(response to lipopolysaccharide);GO:0032691(negative regulation of interleukin-1 beta production);GO:0032695(negative regulation of interleukin-12 production);GO:0032720(negative …	00740(Riboflavin metabolism);04142(Lysosome);04380(Osteoclast differentiation);05323(Rheumatoid arthritis);05323(Rheumatoid arthritis)	NA	NA	acid phosphatase 5, tartrate resistant [Source:MGI Symbol;Acc:MGI:87883]	protein_coding;processed_transcript	R_MMU_196854(Metabolism_of_vitamins_and_cofactors);R_MMU_1430728(Metabolism);R_MMU_196849(Metabolism_of_water_soluble_vitamins_and_cofactors);R_MMU_196843(Vitamin_B2_(riboflavin)_metabolism)	678.687	800.525	234.522	198.528	3.4158	1.77222	7.27094e-27	1.0537e-23	up
ENSMUSG00000033016	Nfatc1	68316;68312;68310;68311;68314;68313;68315	ENSMUST00000236711;ENSMUST00000170905;ENSMUST00000167977;ENSMUST00000236310;ENSMUST00000237776;ENSMUST00000078049;ENSMUST00000035800	GO:0000790(nuclear chromatin);GO:0000977(RNA polymerase II regulatory region sequence-specific DNA binding);GO:0001225(RNA polymerase II transcription coactivator binding);GO:0003677(DNA binding);GO:0003700(DNA-binding transcription factor activity);GO:0005634(nucleus);GO:0005654(nucleoplasm);GO:0006355(regulation of transcription, DNA-templated);GO:0016604(nuclear body);GO:0033173(calcineurin-NF…	04010(MAPK signaling pathway);04022(cGMP-PKG signaling pathway);04024(cAMP signaling pathway);04218(Cellular senescence);04310(Wnt signaling pathway);04380(Osteoclast differentiation);04625(C-type lectin receptor signaling pathway);04650(Natural killer cell mediated cytotoxicity);04658(Th1 and Th2 cell differentiation);04659(Th17 cell differentiation);04660(T cell receptor signaling pathway);0466…	K04446	NA	nuclear factor of activated T cells, cytoplasmic, calcineurin dependent 1 [Source:MGI Symbol;Acc:MGI:102469]	protein_coding;processed_transcript	R_MMU_2871809(FCERI_mediated_Ca+2_mobilization);R_MMU_983705(Signaling_by_the_B_Cell_Receptor_(BCR));R_MMU_2025928(Calcineurin_activates_NFAT);R_MMU_5607764(CLEC7A_(Dectin_1)_signaling);R_MMU_3858494(Beta_catenin_independent_WNT_signaling);R_MMU_195721(Signaling_by_WNT);R_MMU_5621481(C_type_lectin_receptors_(CLRs));R_MMU_168256(Immune_System);R_MMU_4086398(Ca2+_pathway);R_MMU_1168372(Downstream_s…	15.2933	15.7144	10.4953	12.1832	1.36727	0.4513	0.00111567	0.0112231	up
ENSMUSG00000022303	Dcstamp	49332;49330;49331;49334;49333;49329	ENSMUST00000022913;ENSMUST00000227368;ENSMUST00000228556;ENSMUST00000227792;ENSMUST00000228701;ENSMUST00000226831	GO:0002376(immune system process);GO:0005768(endosome);GO:0005783(endoplasmic reticulum);GO:0005789(endoplasmic reticulum membrane);GO:0005886(plasma membrane);GO:0009986(cell surface);GO:0010008(endosome membrane);GO:0016020(membrane);GO:0016021(integral component of membrane);GO:0030154(cell differentiation);GO:0030176(integral component of endoplasmic reticulum membrane);GO:0030308(negative re…	NA	NA	NA	dendrocyte expressed seven transmembrane protein [Source:MGI Symbol;Acc:MGI:1923016]	protein_coding;processed_transcript	NA	8.08495	9.14118	1.52892	1.71075	5.31726	2.41068	2.15015e-28	3.895e-25	up
ENSMUSG00000028238	Atp6v0d2	91358	ENSMUST00000029900	GO:0005765(lysosomal membrane);GO:0005768(endosome);GO:0005769(early endosome);GO:0006811(ion transport);GO:0007034(vacuolar transport);GO:0007035(vacuolar acidification);GO:0008553(proton-exporting ATPase activity, phosphorylative mechanism);GO:0015078(proton transmembrane transporter activity);GO:0016020(membrane);GO:0016324(apical plasma membrane);GO:0016471(vacuolar proton-transporting V-type…	00190(Oxidative phosphorylation);04142(Lysosome);04145(Phagosome);04721(Synaptic vesicle cycle);04966(Collecting duct acid secretion);05152(Tuberculosis);05165(Human papillomavirus infection);05203(Viral carcinogenesis);05323(Rheumatoid arthritis)	K02146	NA	ATPase, H+ transporting, lysosomal V0 subunit D2 [Source:MGI Symbol;Acc:MGI:1924415]	protein_coding	R_MMU_1222556(ROS_and_RNS_production_in_phagocytes);R_MMU_2262752(Cellular_responses_to_stress);R_MMU_74752(Signaling_by_Insulin_receptor);R_MMU_9711097(Cellular_response_to_starvation);R_MMU_8953897(Cellular_responses_to_external_stimuli);R_MMU_9639288(Amino_acids_regulate_mTORC1);R_MMU_382551(Transport_of_small_molecules);R_MMU_917977(Transferrin_endocytosis_and_recycling);R_MMU_168256(Immune_S…	34.8813	35.4711	11.7552	9.79648	3.26436	1.7068	3.57819e-24	3.84112e-21	up
ENSMUSG00000024621	Csf1r	67376;67373;67375;67374;67377	ENSMUST00000115268;ENSMUST00000025523;ENSMUST00000237706;ENSMUST00000235447;ENSMUST00000237485	GO:0000166(nucleotide binding);GO:0001934(positive regulation of protein phosphorylation);GO:0002244(hematopoietic progenitor cell differentiation);GO:0002376(immune system process);GO:0002931(response to ischemia);GO:0004672(protein kinase activity);GO:0004713(protein tyrosine kinase activity);GO:0004714(transmembrane receptor protein tyrosine kinase activity);GO:0005011(macrophage colony-stimul…	04010(MAPK signaling pathway);04014(Ras signaling pathway);04015(Rap1 signaling pathway);04060(Cytokine-cytokine receptor interaction);04151(PI3K-Akt signaling pathway);04380(Osteoclast differentiation);04640(Hematopoietic cell lineage);05200(Pathways in cancer);05202(Transcriptional misregulation in cancer);05221(Acute myeloid leukemia);05221(Acute myeloid leukemia)	K05090	EC:2.7.10.1	colony stimulating factor 1 receptor [Source:MGI Symbol;Acc:MGI:1339758]	protein_coding;retained_intron	R_MMU_449147(Signaling_by_Interleukins);R_MMU_449836(Other_interleukin_signaling);R_MMU_168256(Immune_System);R_MMU_1280215(Cytokine_Signaling_in_Immune_system)	59.3804	59.7108	42.6557	33.956	1.55448	0.63643	2.91303e-05	0.000536857	up
ENSMUSG00000054594	Oscar	115555;115554	ENSMUST00000108645;ENSMUST00000039507	GO:0005515(protein binding);GO:0005886(plasma membrane);GO:0009986(cell surface);GO:0016020(membrane);GO:0016021(integral component of membrane);GO:0030316(osteoclast differentiation);GO:0032623(interleukin-2 production);GO:0038064(collagen receptor activity);GO:0038065(collagen-activated signaling pathway);GO:0038094(Fc-gamma receptor signaling pathway);GO:0045780(positive regulation of bone res…	04380(Osteoclast differentiation);04380(Osteoclast differentiation)	K14377	NA	osteoclast associated receptor [Source:MGI Symbol;Acc:MGI:2179720]	protein_coding	R_MMU_198933(Immunoregulatory_interactions_between_a_Lymphoid_and_a_non_Lymphoid_cell);R_MMU_168256(Immune_System);R_MMU_6798695(Neutrophil_degranulation);R_MMU_168249(Innate_Immune_System);R_MMU_1280218(Adaptive_Immune_System)	17.7495	14.3757	3.62667	3.89161	4.27295	2.09523	2.02628e-20	1.58729e-17	up
ENSMUSG00000026321	Tnfrsf11a	11873;11874;11875	ENSMUST00000027559;ENSMUST00000187812;ENSMUST00000187658	GO:0001503(ossification);GO:0002250(adaptive immune response);GO:0004888(transmembrane signaling receptor activity);GO:0005031(tumor necrosis factor-activated receptor activity);GO:0005515(protein binding);GO:0005829(cytosol);GO:0005886(plasma membrane);GO:0007275(multicellular organism development);GO:0009314(response to radiation);GO:0009897(external side of plasma membrane);GO:0009986(cell sur…	04060(Cytokine-cytokine receptor interaction);04064(NF-kappa B signaling pathway);04380(Osteoclast differentiation);04917(Prolactin signaling pathway);05323(Rheumatoid arthritis);05323(Rheumatoid arthritis)	K05147	NA	tumor necrosis factor receptor superfamily, member 11a, NFKB activator [Source:MGI Symbol;Acc:MGI:1314891]	protein_coding;retained_intron	R_MMU_5668541(TNFR2_non_canonical_NF_kB_pathway);R_MMU_168256(Immune_System);R_MMU_1280215(Cytokine_Signaling_in_Immune_system);R_MMU_5676594(TNF_receptor_superfamily_(TNFSF)_members_mediating_non_canonical_NF_kB_pathway)	3.99286	3.19044	1.5669	1.33044	2.47927	1.30992	1.7737e-08	9.81086e-07	up
ENSMUSG00000021250	Fos	34543;34546;34544	ENSMUST00000021674;ENSMUST00000134311;ENSMUST00000136122	GO:0000976(transcription regulatory region sequence-specific DNA binding);GO:0000978(RNA polymerase II cis-regulatory region sequence-specific DNA binding);GO:0000979(RNA polymerase II core promoter sequence-specific DNA binding);GO:0000981(DNA-binding transcription factor activity, RNA polymerase II-specific);GO:0001102(RNA polymerase II activating transcription factor binding);GO:0001228(DNA-bi…	01522(Endocrine resistance);04010(MAPK signaling pathway);04024(cAMP signaling pathway);04210(Apoptosis);04380(Osteoclast differentiation);04620(Toll-like receptor signaling pathway);04657(IL-17 signaling pathway);04658(Th1 and Th2 cell differentiation);04659(Th17 cell differentiation);04660(T cell receptor signaling pathway);04662(B cell receptor signaling pathway);04668(TNF signaling pathway);0…	K04379	NA	FBJ osteosarcoma oncogene [Source:MGI Symbol;Acc:MGI:95574]	protein_coding;processed_transcript	R_MMU_448424(Interleukin_17_signaling);R_MMU_2559580(Oxidative_Stress_Induced_Senescence);R_MMU_166058(MyD88:MAL(TIRAP)_cascade_initiated_on_plasma_membrane);R_MMU_168179(Toll_Like_Receptor_TLR1:TLR2_Cascade);R_MMU_449147(Signaling_by_Interleukins);R_MMU_166016(Toll_Like_Receptor_4_(TLR4)_Cascade);R_MMU_168181(Toll_Like_Receptor_7/8_(TLR7/8)_Cascade);R_MMU_2559583(Cellular_Senescence);R_MMU_22627…	12.7574	10.4747	8.18688	7.87261	1.44662	0.532691	0.00275866	0.0235406	up
ENSMUSG00000027670	Ocstamp	82833	ENSMUST00000029213	GO:0003674(molecular_function);GO:0005575(cellular_component);GO:0016020(membrane);GO:0016021(integral component of membrane);GO:0030154(cell differentiation);GO:0034241(positive regulation of macrophage fusion);GO:0045672(positive regulation of osteoclast differentiation);GO:0071356(cellular response to tumor necrosis factor);GO:0071391(cellular response to estrogen stimulus);GO:0072674(multinuc…	NA	NA	NA	osteoclast stimulatory transmembrane protein [Source:MGI Symbol;Acc:MGI:1921864]	protein_coding	NA	4.74908	4.72044	1.65182	1.35923	3.14492	1.65302	9.99342e-14	2.31719e-11	up
