# Supplementary material for: Creating an atlas of the bone microenvironment during oral inflammatory-related bone disease using single-cell profiling
Source: eLife journal article supplement (doi:10.7554/elife.82537), 2023-02-01
Supplement: supp [file Figure1-figure supplement 1A source data.xlsx]

## Sheet: Sheet1
Figure 1-figure supplement 1A	Control	AP
Estimated number of cells	8340	6808
Number of Reads	508910878	526220486
Valid Barcodes	0.972	0.981
Reads Mapped Confidently to Transcriptome	0.599	0.638
Reads Mapped Confidently to Exonic Regions	0.638	0.673
Reads Mapped Confidently to Intronic Regions	0.248	0.212
Reads Mapped Confidently to Intergenic Regions	0.038	0.039
Reads Mapped Antisense to Gene	0.018	0.013
Sequencing Saturation	0.556	0.712
Q30 Bases in Barcode	0.956	0.957
Q30 Bases in RNA Read	0.907	0.904
Q30 Bases in UMI	0.952	0.952
