# Supplementary material for: Creating an atlas of the bone microenvironment during oral inflammatory-related bone disease using single-cell profiling
Source: eLife journal article supplement (doi:10.7554/elife.82537), 2023-02-01
Supplement: supp [file Figure1-figure supplement 1B source data.xlsx]

## Sheet: Sheet1
Figure 1-figure supplement 1B Distribution of the number of genes per single-cell
QC-Control				QC-AP
Distribution of the number of genes per single-cell	number of cells			Distribution of the number of genes per single-cell	number of cells
400	56			400	180
600	171			600	392
800	124			800	287
1000	138			1000	264
1200	225			1200	343
1400	494			1400	427
1600	594			1600	454
1800	645			1800	418
2000	615			2000	414
2200	504			2200	350
2400	396			2400	243
2600	284			2600	212
2800	215			2800	161
3000	190			3000	190
3200	200			3200	167
3400	239			3400	142
3600	249			3600	154
3800	233			3800	139
4000	194			4000	148
4200	165			4200	105
4400	149			4400	116
4600	133			4600	95
4800	144			4800	76
5000	116			5000	90
5200	128			5200	60
5400	100			5400	61
5600	103			5600	49
5800	88			5800	45
6000	102			6000	42
6200	81			6200	37
6400	62			6400	32
6600	44			6600	32
6800	42			6800	21
7000	25			7000	17
