# Supplementary material for: Creating an atlas of the bone microenvironment during oral inflammatory-related bone disease using single-cell profiling
Source: eLife journal article supplement (doi:10.7554/elife.82537), 2023-02-01
Supplement: supp [file Figure1D-source data.xlsx]

## Sheet: APvscontrol_sample_persent
	Figure 1D Relative abundance of 15 cell populations composing alveolar bone under healthy and AP conditions
	Cluster	AP	control
	B cell	0.121751	0.0768488
	dendritic cell	0.0209626	0.026628
	epithelial Cell	0.0102298	0.00275938
	erythrocyte	0.0130807	0.0111755
	HSC	0.0164347	0.0212472
	macrophage	0.127956	0.084989
	mast cell	0.00654033	0.0104857
	megakaryocyte	0.00721114	0.0117274
	monocyte	0.0618816	0.0733996
	MSC	0.0216334	0.0140728
	myeloid progenitor	0.0384035	0.0481512
	neutrophil	0.451283	0.554222
	NK cell	0.021298	0.0153146
	pre B cell	0.0441053	0.0259382
	T cell	0.0372296	0.0230408
