# Supplementary material for: Creating an atlas of the bone microenvironment during oral inflammatory-related bone disease using single-cell profiling
Source: eLife journal article supplement (doi:10.7554/elife.82537), 2023-02-01
Supplement: supp [file Figure2A-source data.xlsx]

## Sheet: Sheet1
Figure 2A Bar plot of cells per cluster (AP versus Control). Normalization to overall number of inputs per condition. Fisher’s exact test with Bonferroni correction was used.
cluster	log2(% of cells AP/ % of cells Control)
B cell	0.663837		B cell	control	AP	P value		Monocyte	control	AP	P value
dendritic cell	-0.345128		other cell	7055	5838	0.0349		other cell	6716	5594	0.0093
epithelial cell	1.89035		positive cell	193	125			positive cell	532	369
erythrocyte	0.227097
HSC	-0.370532		Dendritic cell	control	AP	P value		MSC	control	AP	P value
macrophage	0.590297		other cell	6691	5237	<0.0001		other cell	7146	5834	0.0011
mast cell	-0.680981		positive cell	557	726			positive cell	102	129
megakaryocyte	-0.701582
monocyte	-0.246261		Epithelial Cell	control	AP	P value		Myeloid progenitor	control	AP	P value
MSC	0.620347		other cell	7228	5902	<0.0001		other cell	6899	5734	0.007
myeloid progenitor	-0.326335		positive cell	20	61			positive cell	349	229
neutrophil	-0.296432
NK cell	0.475813		Erythrocyte	control	AP	P value		Neutrophil	control	AP	P value
pre B cell	0.765875		other cell	7167	5885	0.3364		other cell	3231	3272	<0.0001
T cell	0.692256		positive cell	81	78			positive cell	4017	2691
			HSC	control	AP	P value		NK cell	control	AP	P value
			other cell	7094	5865	0.0475		other cell	7137	5836	0.0104
			positive cell	154	98			positive cell	111	127
			Macrophage	control	AP	P value		Pre B cell	control	AP	P value
			other cell	7172	5924	0.0183		other cell	7060	5700	<0.0001
			positive cell	76	39			positive cell	188	263
			Mast cell	control	AP	P value		T cell	control	AP	P value
			other cell	6632	5200	<0.0001		other cell	7081	5741	<0.0001
			positive cell	616	763			positive cell	167	222
			Megakaryocyte	control	AP	P value
			other cell	7163	5920	0.0094
			positive cell	85	43
