# Supplementary material for: Creating an atlas of the bone microenvironment during oral inflammatory-related bone disease using single-cell profiling
Source: eLife journal article supplement (doi:10.7554/elife.82537), 2023-02-01
Supplement: supp [file Figure4D,E-source data.xlsx]

## Sheet: Sheet1
Figure 4D Bar plot of top ten most abundant ligands in all inferred ligand-receptor interactions.					Figure 4E Ranking of Ligand/Source regarding communication gains in AP state.
	control	AP			Tnf/neutrophil	45
Vegfa	1.7177	2.41203			Fn1/MSC	35
Ccl4	3.41673	2.26334			Spp1/macrophage	29
Vegfb	2.37117	2.2303			Sele/MSC	28
Copa	2.6699	3.07286			Fn1/monocyte	26
Tgfb1	3.79014	3.6676			Spp1/neutrophil	23
Fam3c	3.90217	3.60152			Ccl3/mast cell	22
Tnf	3.97685	3.53544			Spp1/MSC	21
Spp1	3.09933	3.63456			Ccl3/monocyte	20
Fn1	3.28603	3.45283			Il1b/macrophage	20
Lgals9	7.24421	7.12044
