# Supplementary material for: Creating an atlas of the bone microenvironment during oral inflammatory-related bone disease using single-cell profiling
Source: eLife journal article supplement (doi:10.7554/elife.82537), 2023-02-01
Supplement: supp [file Figure5-figure supplement 3A,B-source data.xlsx]

## Sheet: Sheet1
Figure 5-figure supplement 3A Quantitative real-time PCR results of mouse RNA samples.									P value
Runx2	control	1.10088	0.841614	1.07816	0.681294	1.33238	0.965663		1.08426e-05
	AP	2.48385	1.86114	1.93379	2.59058	2.95208	2.21877	2.40323
Sparc	control	0.75586	1.45517	1.81025	0.568878	0.00423386	1.4056		0.00708
	AP	2.60483	2.07943	2.56897	2.29929	1.64854	1.58688	1.52223
Col1a1	control	0.707821	1.10876	1.00181	1.02612	1.04825	1.10725		0.000124216
	AP	5.24015	4.65358	4.26216	3.55672	8.88598	4.44041	4.892
Col1a2	control	0.361515	0.409555	2.78394	0.296711	1.27644	0.871836		0.0321047
	AP	8.88966	3.43933	4.07593	2.3902	2.86221	1.90809	1.82403
Bglap	control	0.731345	0.903517	2.06856	0.749305	1.39825	0.149025		0.123498
	AP	2.7965	2.35157	1.17578	0.903517	1.0857	1.15559	2.1564
Figure 5-figure supplement 3B Heatmap of representative genes associated with osteogenesis in bulk RNA-seq analysis.
gene_id	gene_name	EntrezID	transcript_id	GO	KEGG	KO_ENTRY	EC	Description	trans_type	Reactome	FPKM.AP_1	FPKM.AP_2	FPKM.Ctrl_1	FPKM.Ctrl_2	fc	log2(fc)	pval	qval	regulation
ENSMUSG00000039153	Runx2	62788;62798;62797;62792;62789;62800;62799;62791;62794;62801;62809;62796;62795	ENSMUST00000162816;ENSMUST00000113568;ENSMUST00000160673;ENSMUST00000113571;ENSMUST00000238400;ENSMUST00000160199;ENSMUST00000162130;ENSMUST00000113572;ENSMUST00000159943;ENSMUST00000160672;ENSMUST00000161489;ENSMUST00000162629;ENSMUST00000162373	GO:0000790(nuclear chromatin);GO:0000976(transcription regulatory region sequence-specific DNA binding);GO:0000978(RNA polymerase II cis-regulatory region sequence-specific DNA binding);GO:0000981(DNA-binding transcription factor activity, RNA polymerase II-specific);GO:0001228(DNA-binding transcription activator activity, RNA polymerase II-specific);GO:0001501(skeletal system development);GO:000…	04928(Parathyroid hormone synthesis, secretion and action);05202(Transcriptional misregulation in cancer);05202(Transcriptional misregulation in cancer)	K09278	NA	runt related transcription factor 2 [Source:MGI Symbol;Acc:MGI:99829]	nonsense_mediated_decay;protein_coding;retained_intron	R_MMU_8941326(RUNX2_regulates_bone_development);R_MMU_8939902(Regulation_of_RUNX2_expression_and_activity);R_MMU_73857(RNA_Polymerase_II_Transcription);R_MMU_8878166(Transcriptional_regulation_by_RUNX2);R_MMU_212436(Generic_Transcription_Pathway);R_MMU_74160(Gene_expression_(Transcription));R_MMU_8940973(RUNX2_regulates_osteoblast_differentiation)	19.8044	22.406	14.8063	14.629	1.434	0.520049	3.00458e-05	0.000550821	up
ENSMUSG00000018593	Sparc	24871;24877;24873;24879;24874;24872;24875;24876;24878	ENSMUST00000108858;ENSMUST00000130642;ENSMUST00000123775;ENSMUST00000125787;ENSMUST00000213866;ENSMUST00000018737;ENSMUST00000216313;ENSMUST00000214685;ENSMUST00000141530	GO:0001503(ossification);GO:0001937(negative regulation of endothelial cell proliferation);GO:0005201(extracellular matrix structural constituent);GO:0005509(calcium ion binding);GO:0005515(protein binding);GO:0005518(collagen binding);GO:0005576(extracellular region);GO:0005604(basement membrane);GO:0005615(extracellular space);GO:0005634(nucleus);GO:0005737(cytoplasm);GO:0007507(heart developme…	NA	NA	NA	secreted acidic cysteine rich glycoprotein [Source:MGI Symbol;Acc:MGI:98373]	protein_coding;retained_intron	R_MMU_5653656(Vesicle_mediated_transport);R_MMU_3000497(Scavenging_by_Class_H_Receptors);R_MMU_109582(Hemostasis);R_MMU_1474244(Extracellular_matrix_organization);R_MMU_76002(Platelet_activation,_signaling_and_aggregation);R_MMU_2173782(Binding_and_Uptake_of_Ligands_by_Scavenger_Receptors);R_MMU_114608(Platelet_degranulation);R_MMU_76005(Response_to_elevated_platelet_cytosolic_Ca2+);R_MMU_3000178…	4310.46	4580.09	1814.24	2492.15	2.0645	1.04579	9.01658e-08	3.92975e-06	up
ENSMUSG00000001506	Col1a1	28254;28257;28255;28256	ENSMUST00000001547;ENSMUST00000148046;ENSMUST00000139974;ENSMUST00000148593	GO:0001501(skeletal system development);GO:0001503(ossification);GO:0001568(blood vessel development);GO:0001649(osteoblast differentiation);GO:0001957(intramembranous ossification);GO:0001958(endochondral ossification);GO:0002020(protease binding);GO:0005201(extracellular matrix structural constituent);GO:0005515(protein binding);GO:0005576(extracellular region);GO:0005581(collagen trimer);GO:00…	04151(PI3K-Akt signaling pathway);04510(Focal adhesion);04512(ECM-receptor interaction);04611(Platelet activation);04926(Relaxin signaling pathway);04933(AGE-RAGE signaling pathway in diabetic complications);04974(Protein digestion and absorption);05146(Amoebiasis);05165(Human papillomavirus infection);05205(Proteoglycans in cancer);05205(Proteoglycans in cancer)	K06236	NA	collagen, type I, alpha 1 [Source:MGI Symbol;Acc:MGI:88467]	protein_coding;retained_intron;processed_transcript	R_MMU_1650814(Collagen_biosynthesis_and_modifying_enzymes);R_MMU_3000171(Non_integrin_membrane_ECM_interactions);R_MMU_114604(GPVI_mediated_activation_cascade);R_MMU_76009(Platelet_Aggregation_(Plug_Formation));R_MMU_1442490(Collagen_degradation);R_MMU_8875878(MET_promotes_cell_motility);R_MMU_430116(GP1b_IX_V_activation_signalling);R_MMU_109582(Hemostasis);R_MMU_2022090(Assembly_of_collagen_fibr…	5908.58	6744.05	2282.65	3134.98	2.33545	1.2237	1.49206e-09	1.11746e-07	up
ENSMUSG00000029661	Col1a2	107680;107673;107679;107678;107677;107672;107675;107674	ENSMUST00000203346;ENSMUST00000031668;ENSMUST00000124686;ENSMUST00000155687;ENSMUST00000148864;ENSMUST00000141483;ENSMUST00000132029;ENSMUST00000138511	GO:0001501(skeletal system development);GO:0001568(blood vessel development);GO:0002020(protease binding);GO:0005201(extracellular matrix structural constituent);GO:0005515(protein binding);GO:0005576(extracellular region);GO:0005581(collagen trimer);GO:0005584(collagen type I trimer);GO:0005615(extracellular space);GO:0005783(endoplasmic reticulum);GO:0007179(transforming growth factor beta rece…	04151(PI3K-Akt signaling pathway);04510(Focal adhesion);04512(ECM-receptor interaction);04611(Platelet activation);04926(Relaxin signaling pathway);04933(AGE-RAGE signaling pathway in diabetic complications);04974(Protein digestion and absorption);05146(Amoebiasis);05165(Human papillomavirus infection);05205(Proteoglycans in cancer);05205(Proteoglycans in cancer)	K06236	NA	collagen, type I, alpha 2 [Source:MGI Symbol;Acc:MGI:88468]	retained_intron;protein_coding	R_MMU_1650814(Collagen_biosynthesis_and_modifying_enzymes);R_MMU_3000171(Non_integrin_membrane_ECM_interactions);R_MMU_114604(GPVI_mediated_activation_cascade);R_MMU_76009(Platelet_Aggregation_(Plug_Formation));R_MMU_1442490(Collagen_degradation);R_MMU_8875878(MET_promotes_cell_motility);R_MMU_430116(GP1b_IX_V_activation_signalling);R_MMU_109582(Hemostasis);R_MMU_2022090(Assembly_of_collagen_fibr…	2486.56	3293.17	1072.9	1373.21	2.36283	1.24051	1.88023e-09	1.37618e-07	up
