# Supplementary material for: Creating an atlas of the bone microenvironment during oral inflammatory-related bone disease using single-cell profiling
Source: eLife journal article supplement (doi:10.7554/elife.82537), 2023-02-01
Supplement: supp [file Figure5C-source data.xlsx]

## Sheet: Sheet1
Figure 5C The percentages of four subclusters of MSC population.
MSC-control-cluster ratio			MSC-AP-cluster ratio
Cluster_1	42		Cluster_1	52
Cluster_2	30		Cluster_2	45
Cluster_3	22		Cluster_3	29
Cluster_4	8		Cluster_4	3
