# Supplementary material for: Creating an atlas of the bone microenvironment during oral inflammatory-related bone disease using single-cell profiling
Source: eLife journal article supplement (doi:10.7554/elife.82537), 2023-02-01
Supplement: supp [file Figure6D-source data.xlsx]

## Sheet: Sheet1
Figure 6D Bar plot of numerical changes between AP and control in respective states as identified in pseudotime analysis.
branch	state 1	state 2	state 3
odds ratio	1.13999	-0.628166	1.76461
	control	AP	P value
state 1	211	240	0.2632
non state1	1304	1665
	control	AP	P value
state 2	560	352	<0.0001
non state2	955	1554
	control	AP	P value
state 3	744	1314	<0.0001
non state3	770	592
