# Supplementary material for: Creating an atlas of the bone microenvironment during oral inflammatory-related bone disease using single-cell profiling
Source: eLife journal article supplement (doi:10.7554/elife.82537), 2023-02-01
Supplement: supp [file Figure7A-source data.xlsx]

## Sheet: Sheet1
Figure 7A Quantitative real-time PCR results of human RNA samples.												P value
SPP1	ctrl	0.000426	0.424262	0.0001	3.57521							0.26671
	AP	0.000204	2.59014	21.5263	142.817	376.897	0.027262	0.017555	10.5052	314.743	0.105333
SPARC	ctrl	0.348516	3.44451	0.080733	0.126245							0.0159993
	AP	1.60136	9.249	7.18156	3.78239	12.7224	12.9448	20.6676	6.38328	5.53774	9.74254
RUNX2	ctrl	0.446327	0.700362	1.49089	1.36242							0.0168672
	AP	0.40505	6.04681	6.26005	4.42652	4.7607	5.43083	5.13788	9.89139	0.697939	6.82663
COL3A1	ctrl	0.101114	2.20236	1.65755	0.038985							0.0236144
	AP	4.42	2.41839	2.73028	5.2563	7.20525	4.87043	1.75814	3.65292	2.12734	1.41328
OCN	ctrl	1.89985	0.068673	1.54316	0.488316							0.34101
	AP	5.54385	1.57558	1.27977	1.02875	7.65226	2.10802	2.4982	0.3489	0.266256	0.395264
